# Supplementary material for: Nanolayered manganese oxides as water-oxidizing catalysts: the effects of Cu(ii) and Ni(ii) ions
Source: Royal Society of Chemistry journal article supplement (doi:10.1039/c4ra05617e), 2014-01-01
Supplement: c4ra05617e1.pdf [file c4ra05617e1.pdf]

# **Electronic Supplementary Information (ESI)**

# **Nanolayered manganese oxides as water-oxidizing catalysts: The effects of Cu(II) and Ni(II) ions**

**Mohammad Mahdi Najafpour,<sup>a,b\*</sup> Mahnaz Abasi<sup>a</sup> and Malgorzata Holyńska<sup>c</sup>**

<sup>a</sup>*Department of Chemistry, Institute for Advanced Studies in Basic Sciences (IASBS), Zanjan, 45137-66731, Iran.*

<sup>b</sup>*Center of Climate Change and Global Warming, Institute for Advanced Studies in Basic Sciences (IASBS), Zanjan, 45137-66731, Iran.*

<sup>c</sup>*Fachbereich Chemie and Wissenschaftliches Zentrum für Materialwissenschaften (WZMW), Philipps-Universität Marburg, Hans-Meerwein-Straße, D-35032 Marburg, Germany*

*\*Corresponding Author:*

*Phone: (+98) 241 415 3201. E-mail: [mmnajafpour@iasbs.ac.ir](mailto:mmnajafpour@iasbs.ac.ir):*

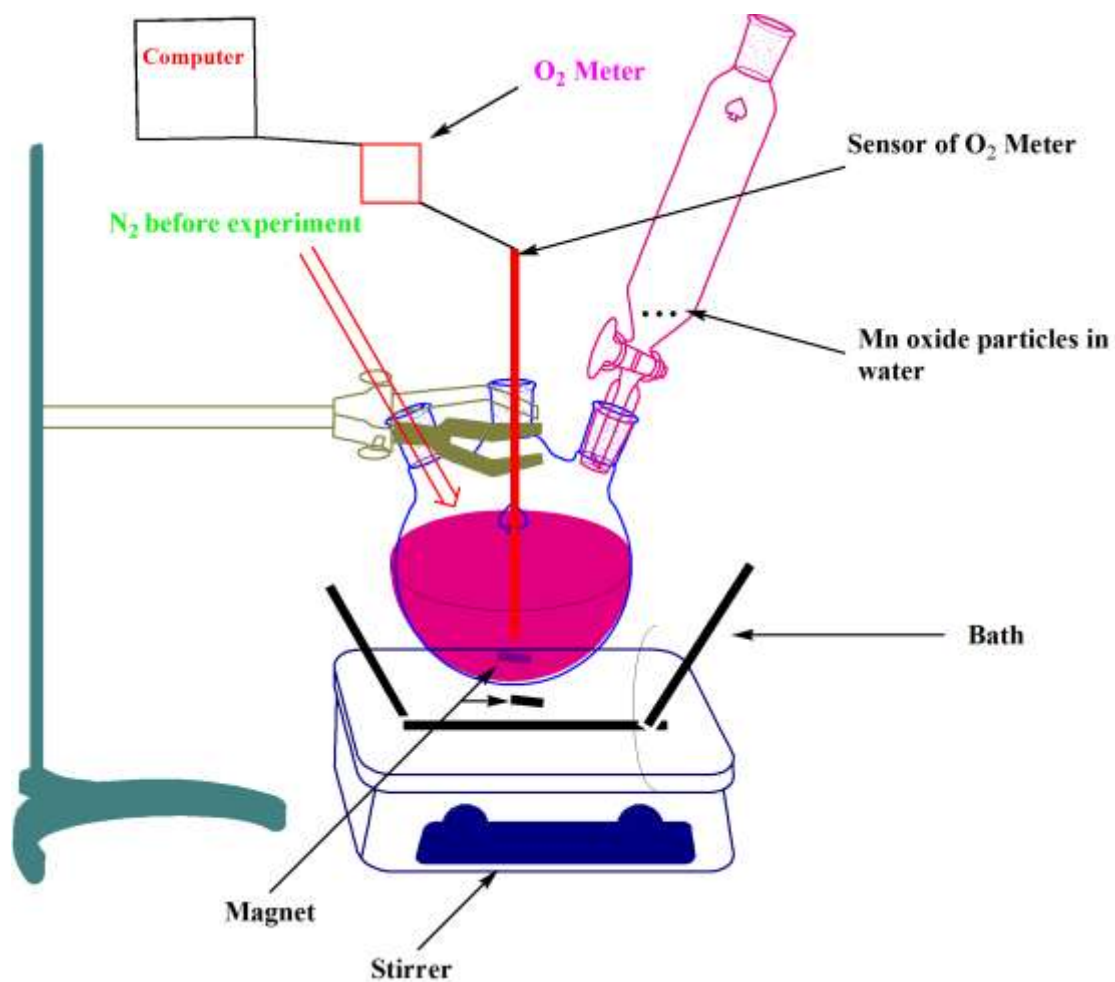

Fig. S1. The reactor set-up for oxygen evolution experiment in the presence of Ce(IV).

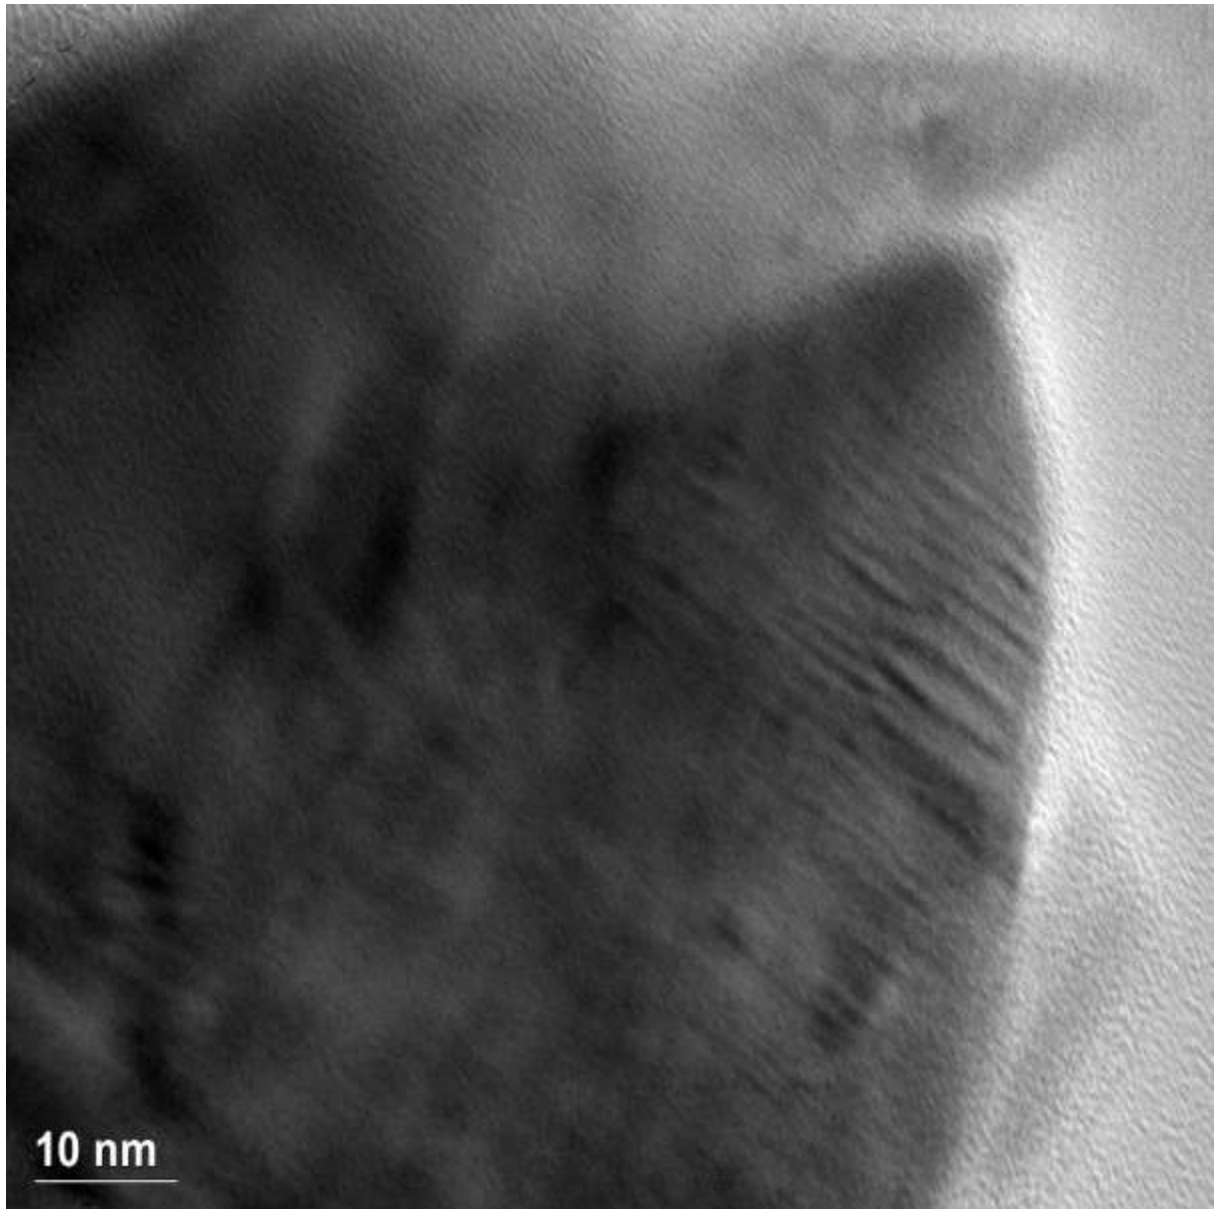

a

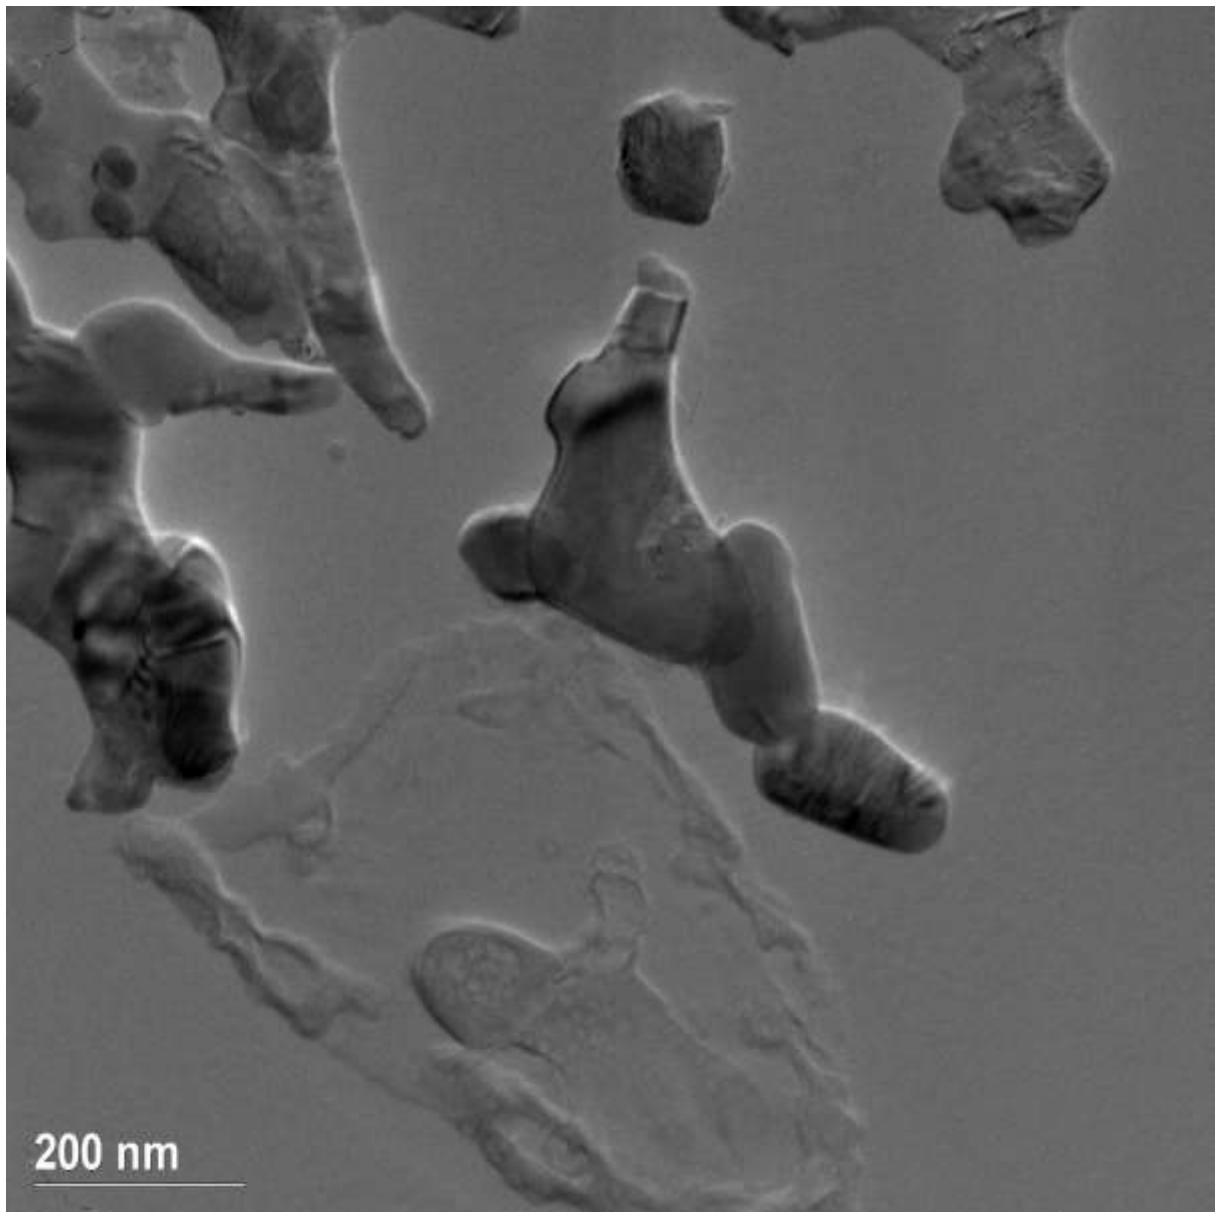

b

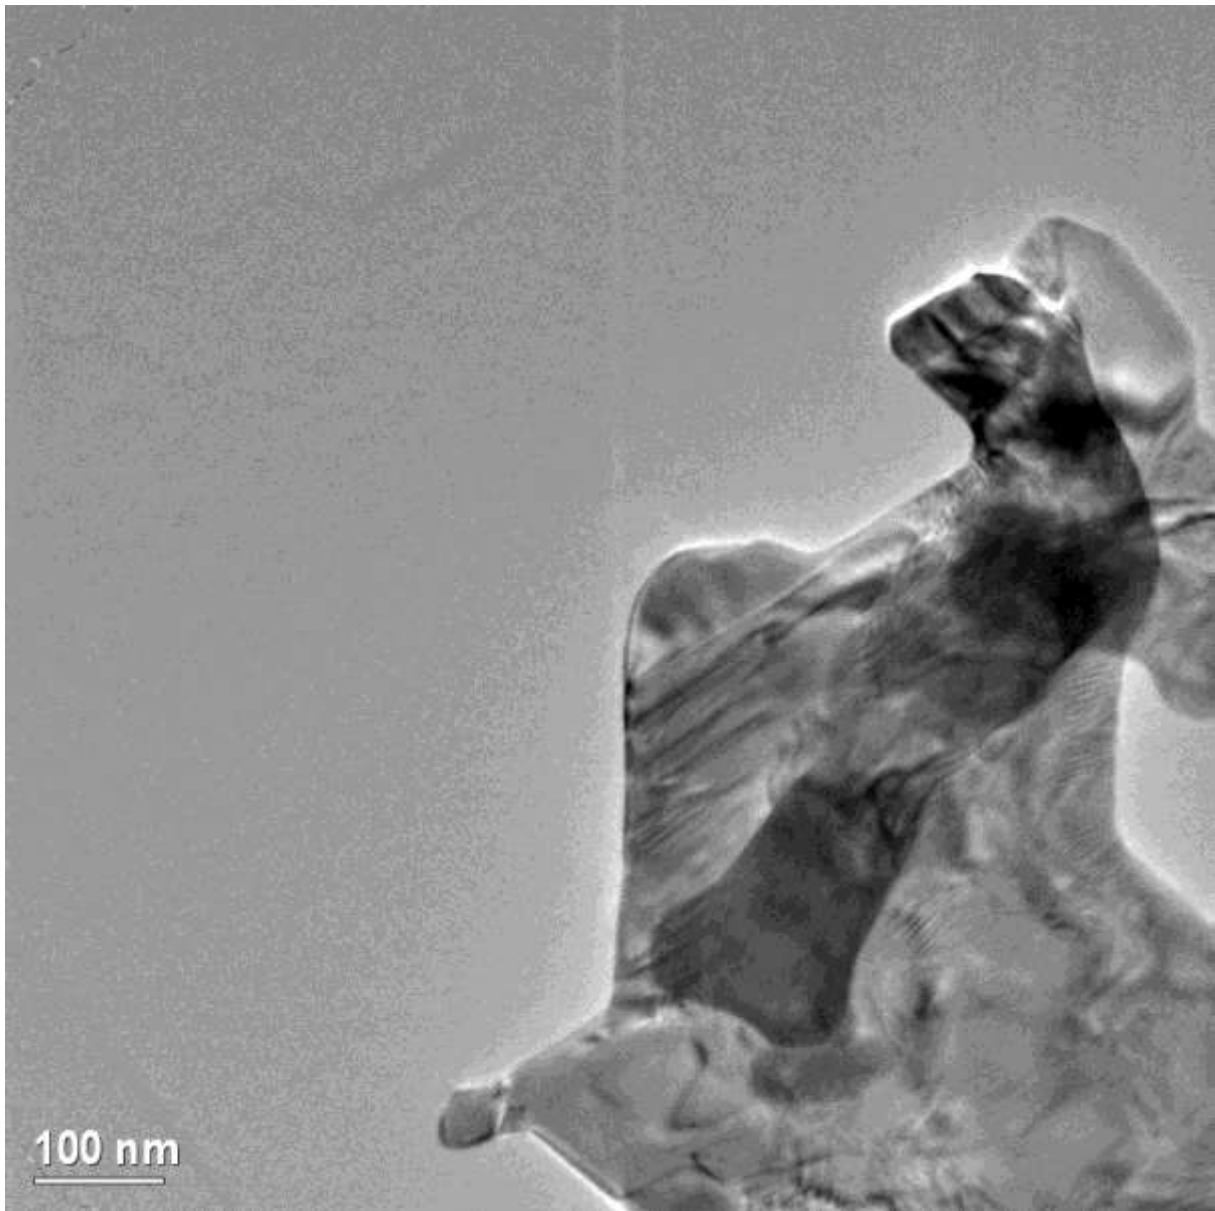

**c**

Fig. S2 TEM images for 4-Cu calcinated at 200 °C.

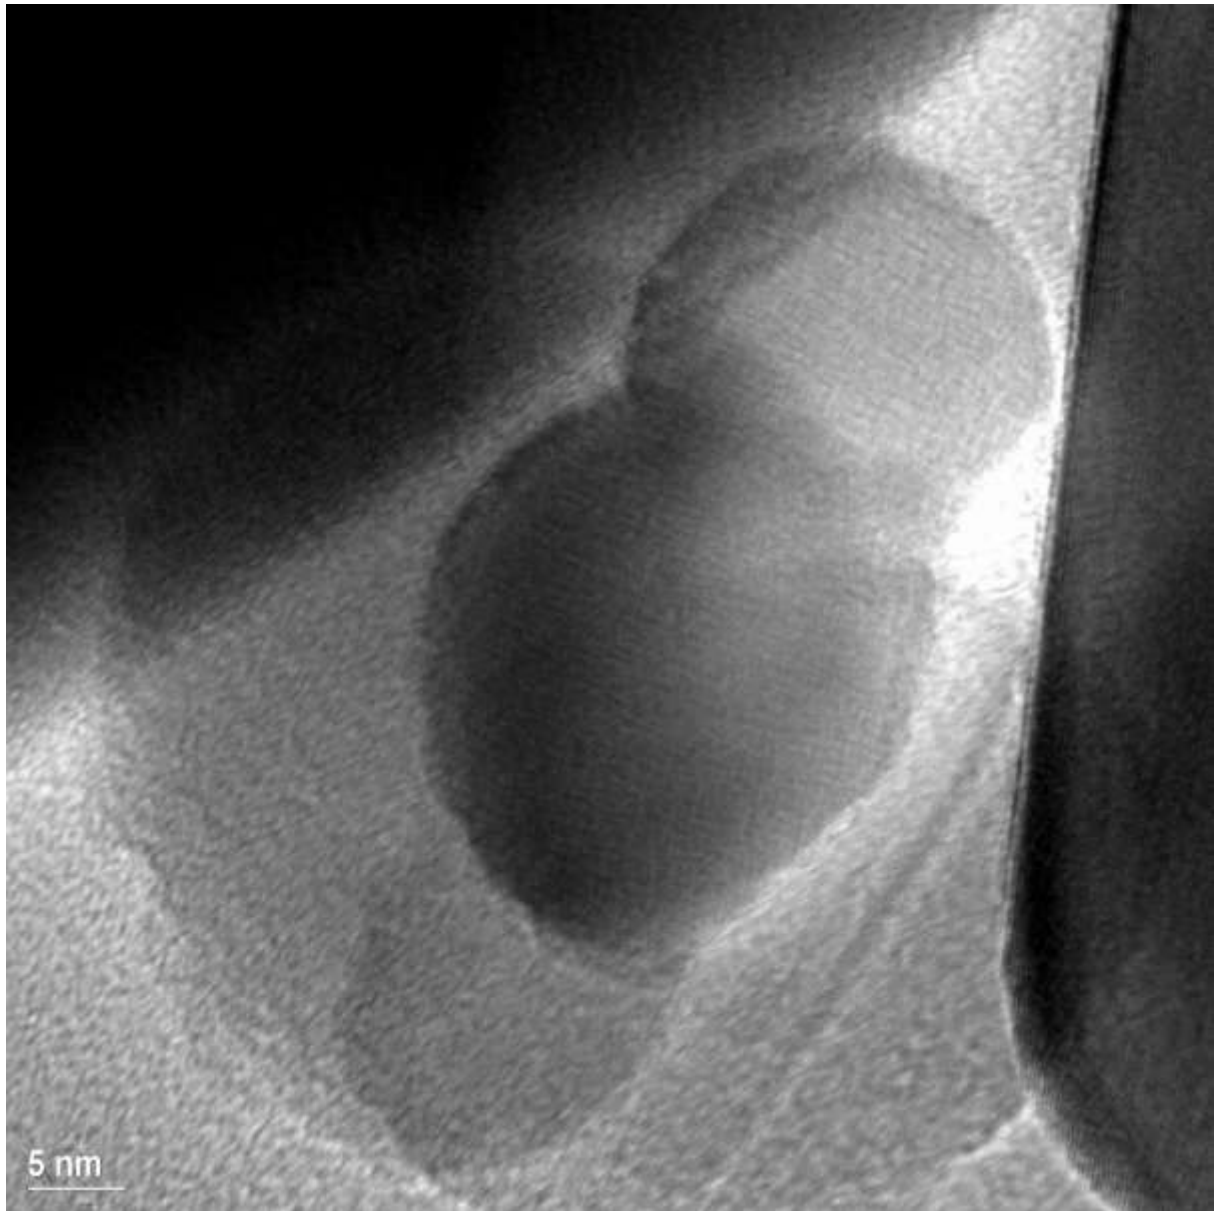

a

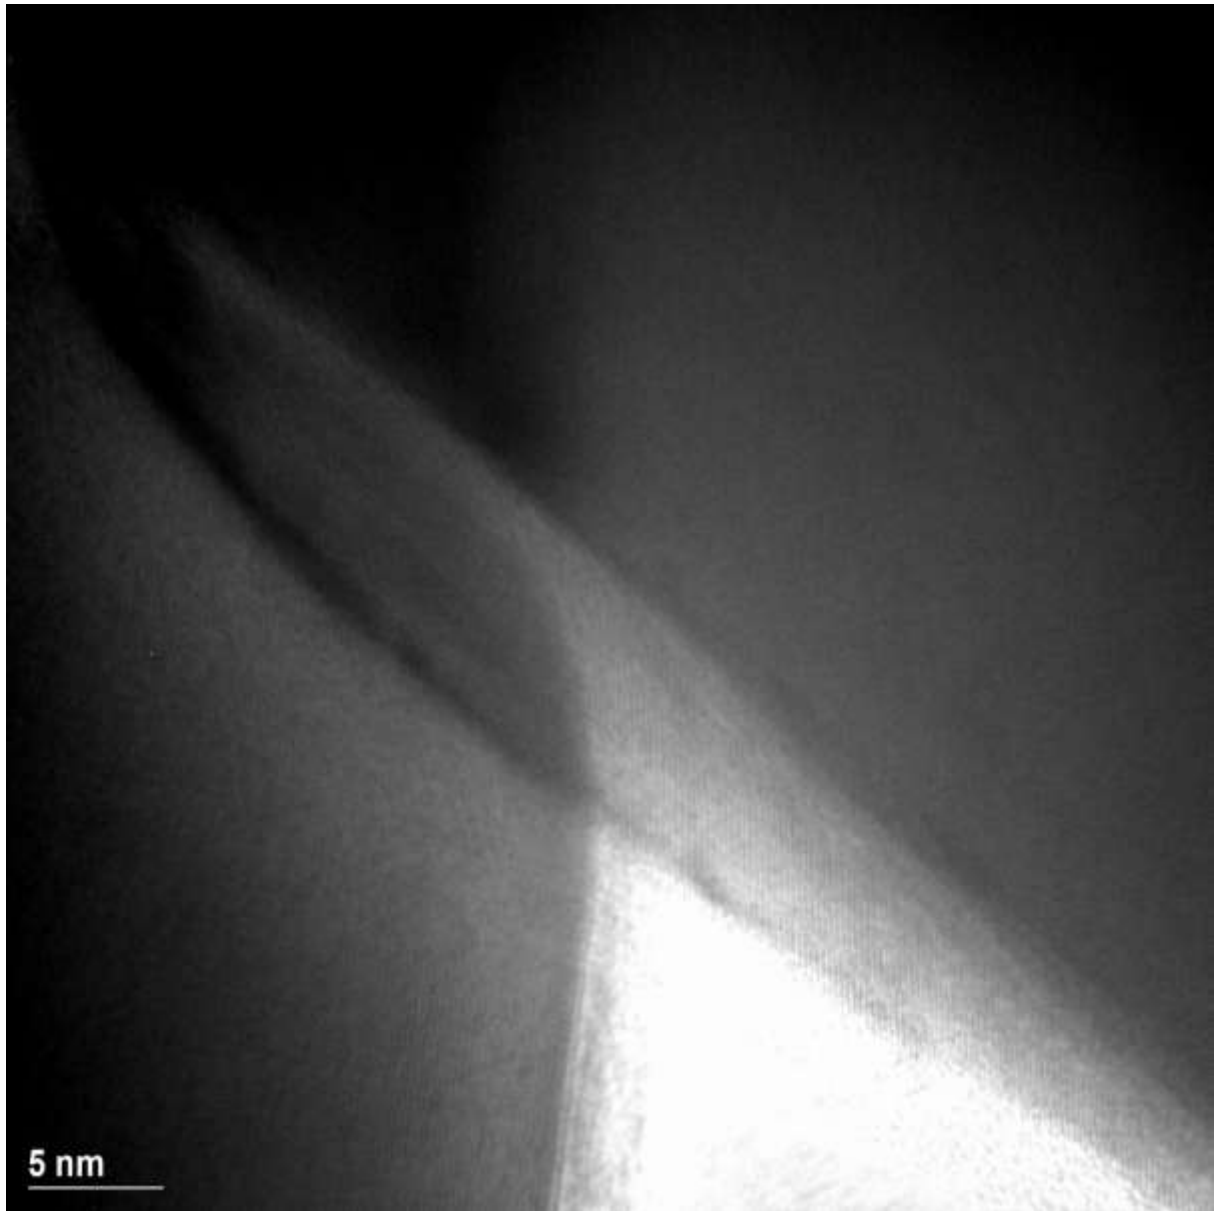

b



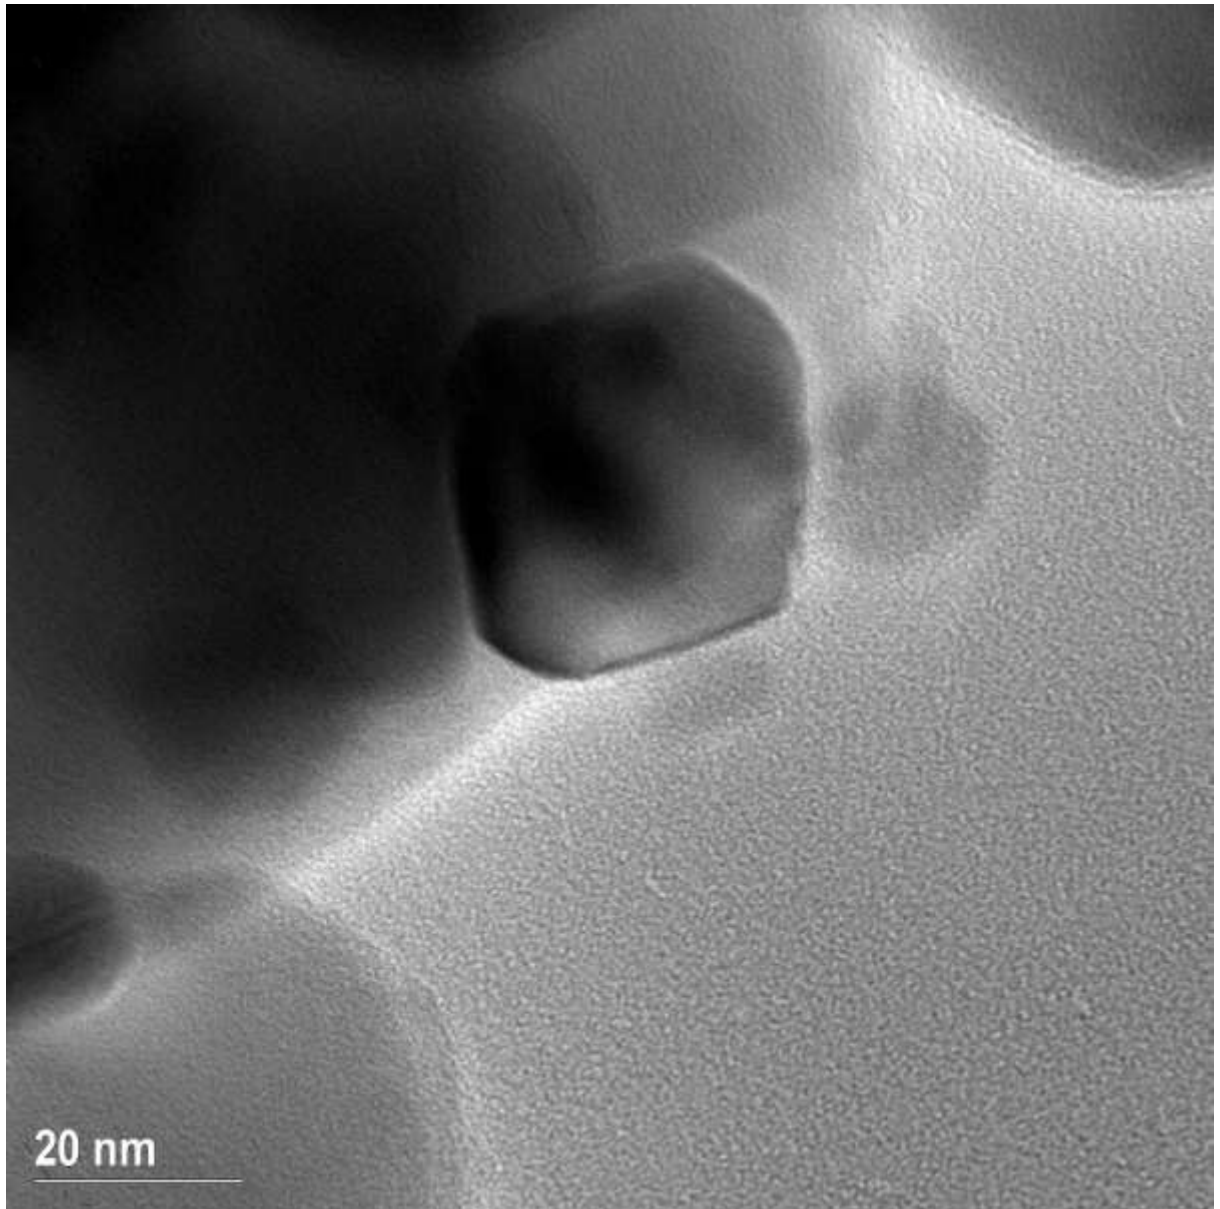

c

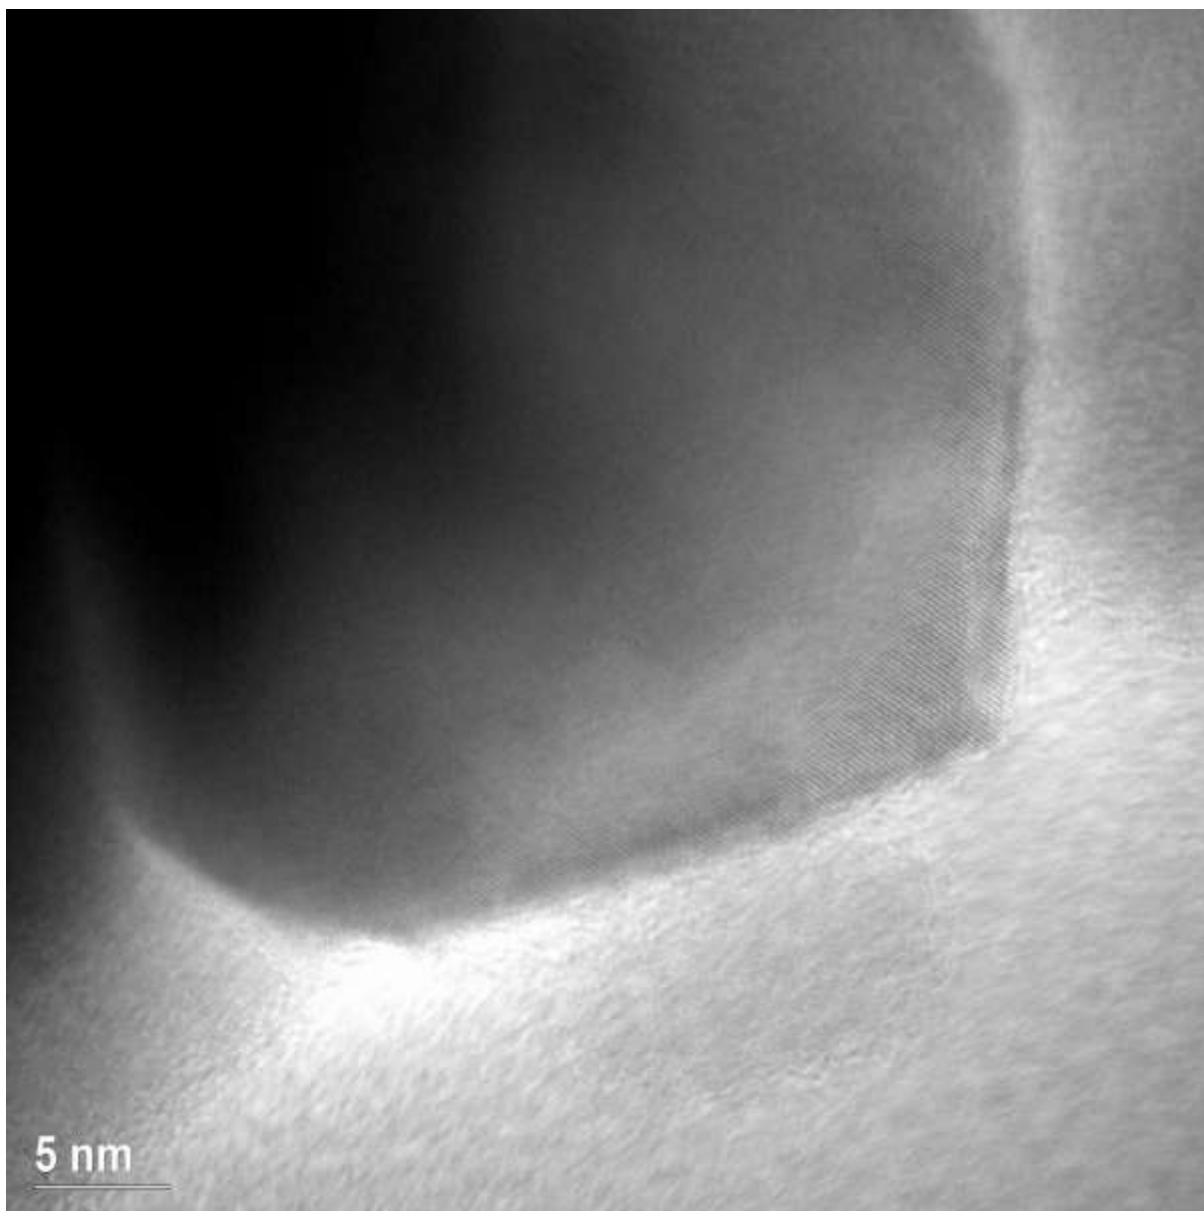

d

Fig. S3 TEM images for 4-Ni calcinated at 400 °C.

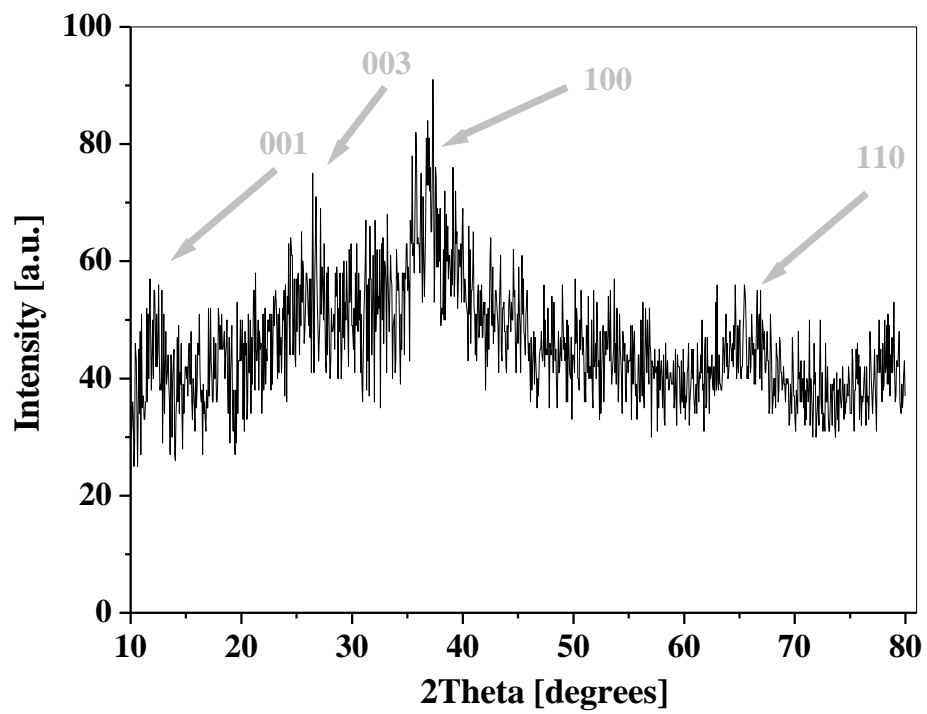

a

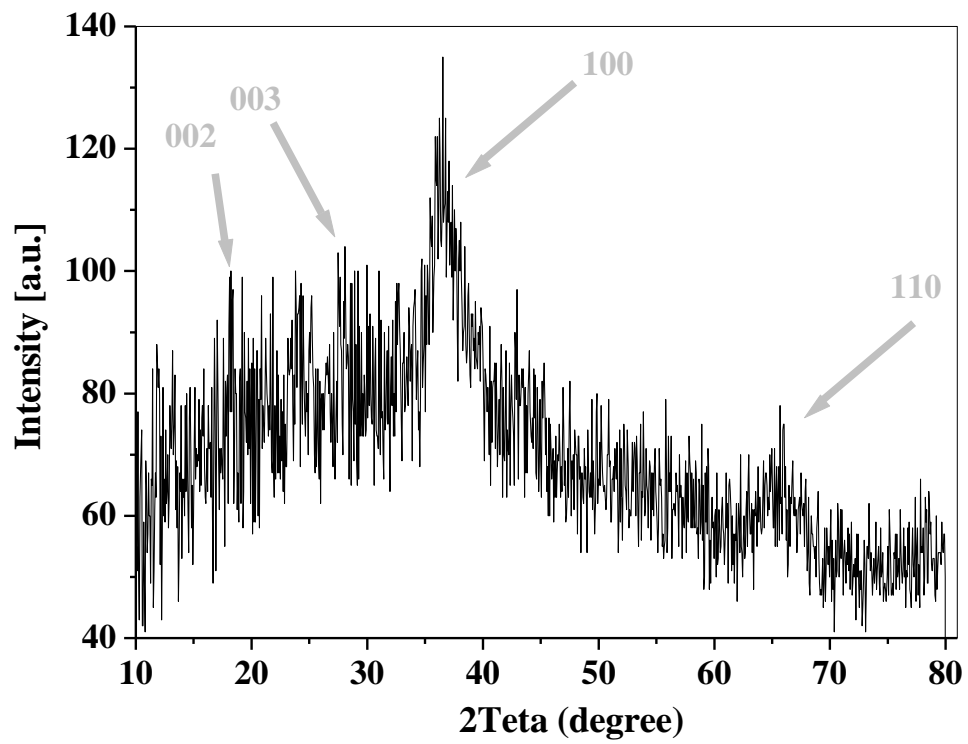

b

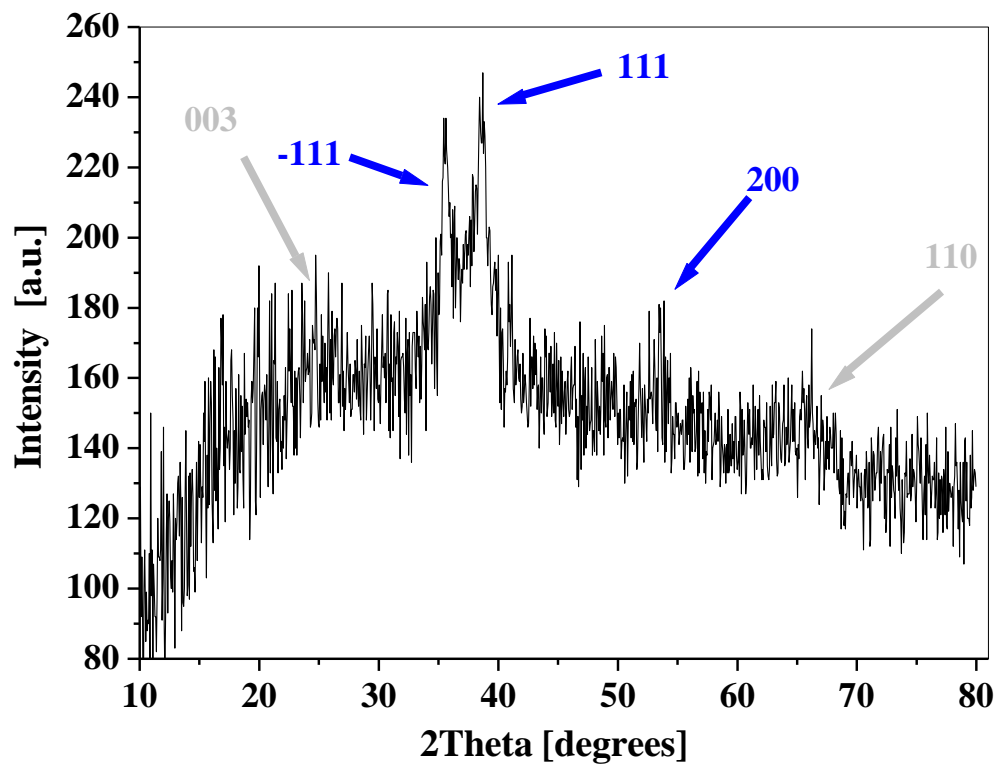

c

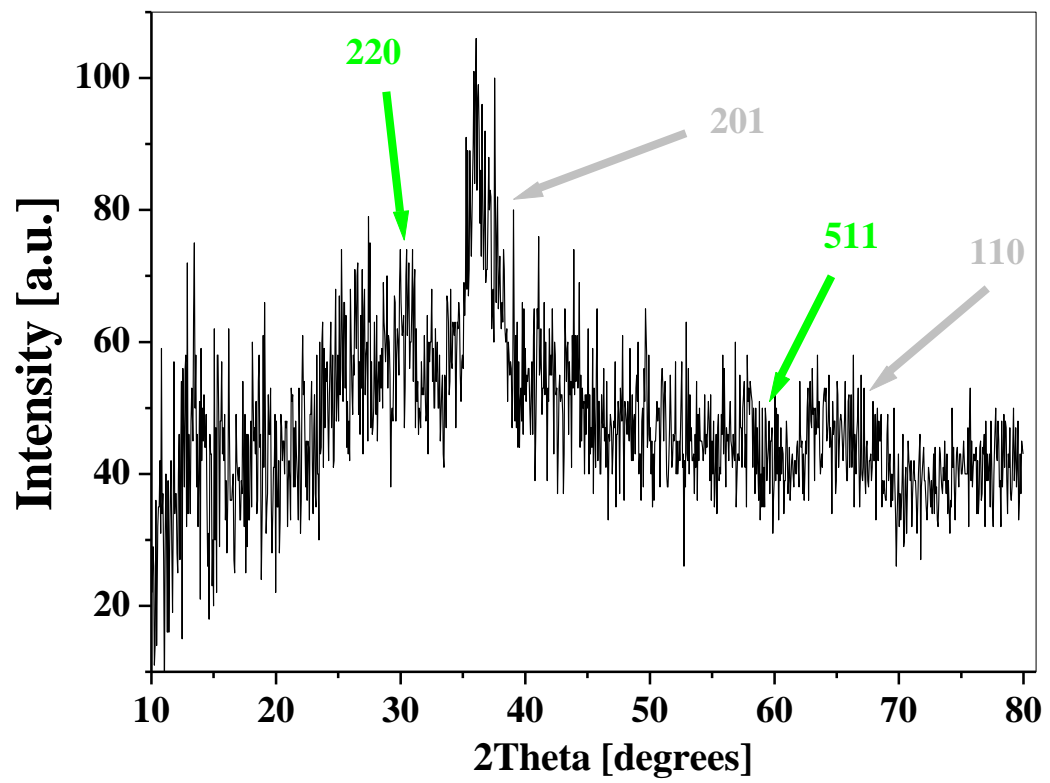

d

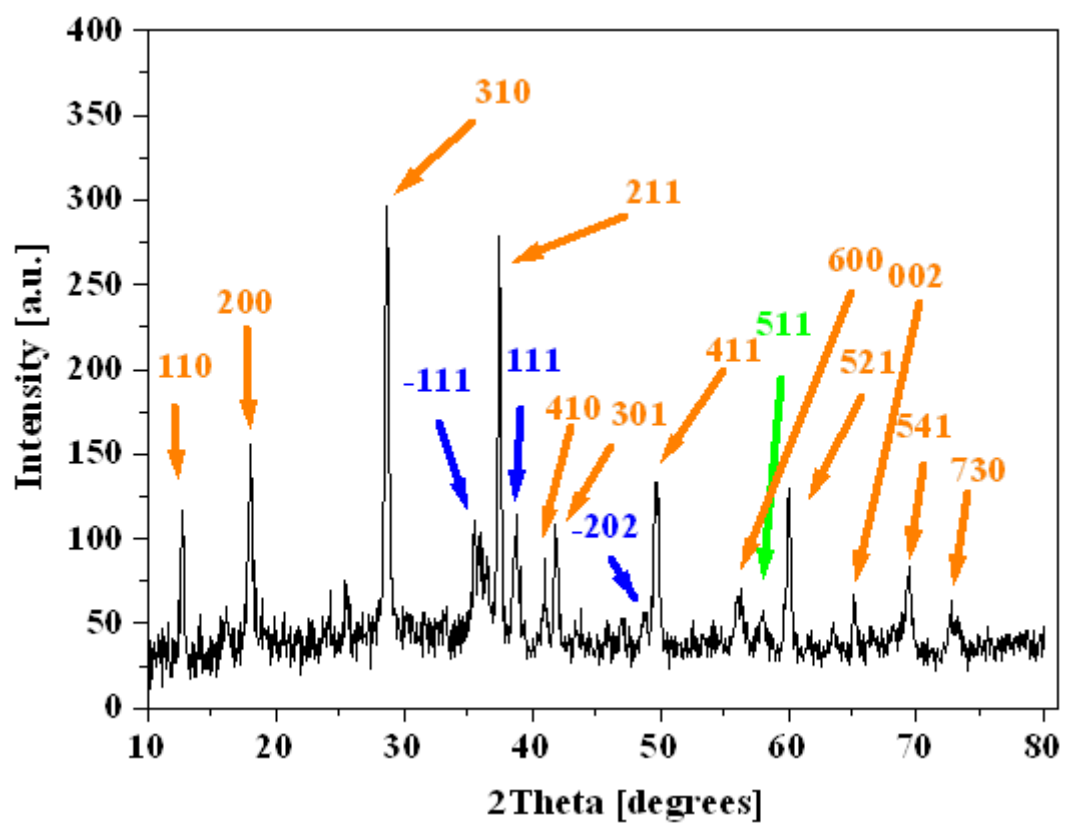

e

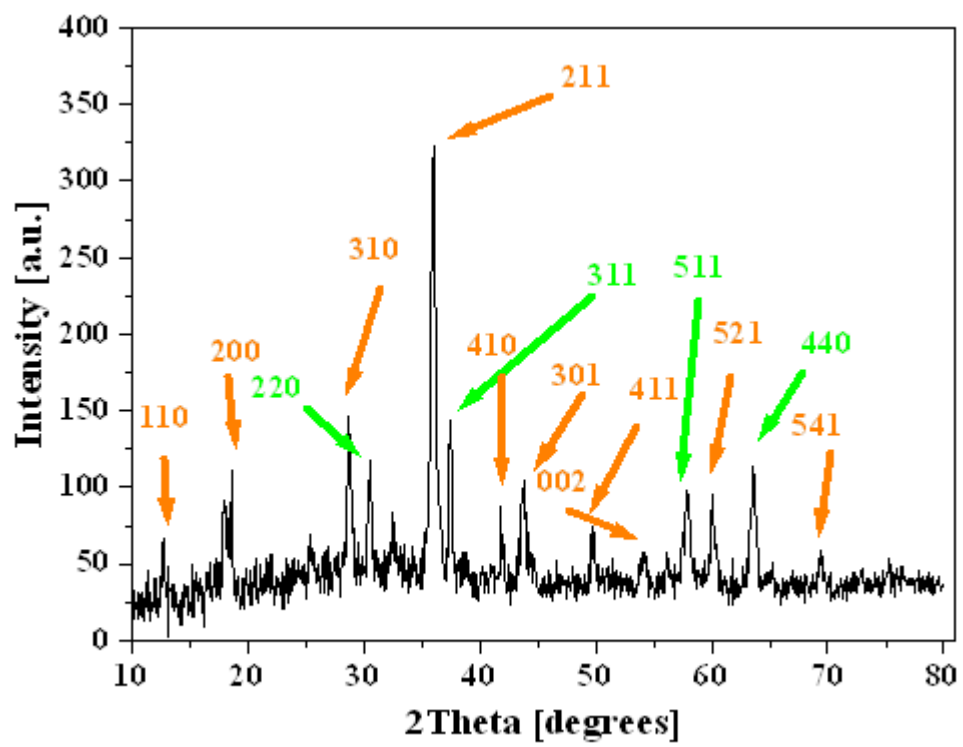

f



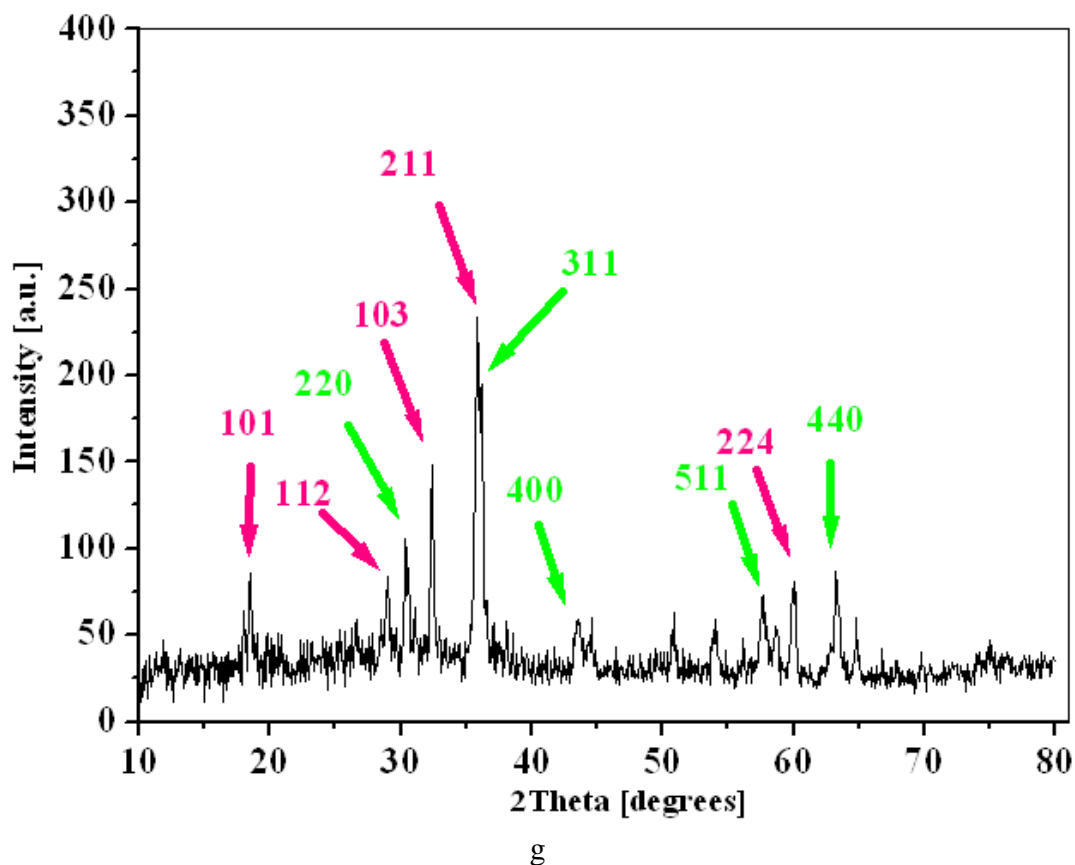

Fig. S4 XRD patterns for **3-Cu** (a), **5-Cu** (b) and **7-Cu** (c). **4-Cu** at calcinated at 300 (d), 500 (e), 600 (f) and 700 (g) °C. Grey patterns for a-d show layered Mn oxide. In c, pattern (blue arrows) for CuO is also observed. CuMn<sub>2</sub>O<sub>4</sub> (green arrows) is observed in d. e contains KMn<sub>8</sub>O<sub>16</sub> (orange arrows), CuO (blue arrows) and CuMn<sub>2</sub>O<sub>4</sub> (green arrows). In f, KMn<sub>8</sub>O<sub>16</sub> (orange arrows) and CuMn<sub>2</sub>O<sub>4</sub> (green arrows) are detected. In g, Mn<sub>3</sub>O<sub>4</sub> (pink arrows) and CuMn<sub>2</sub>O<sub>4</sub> (green) arrows are observed.

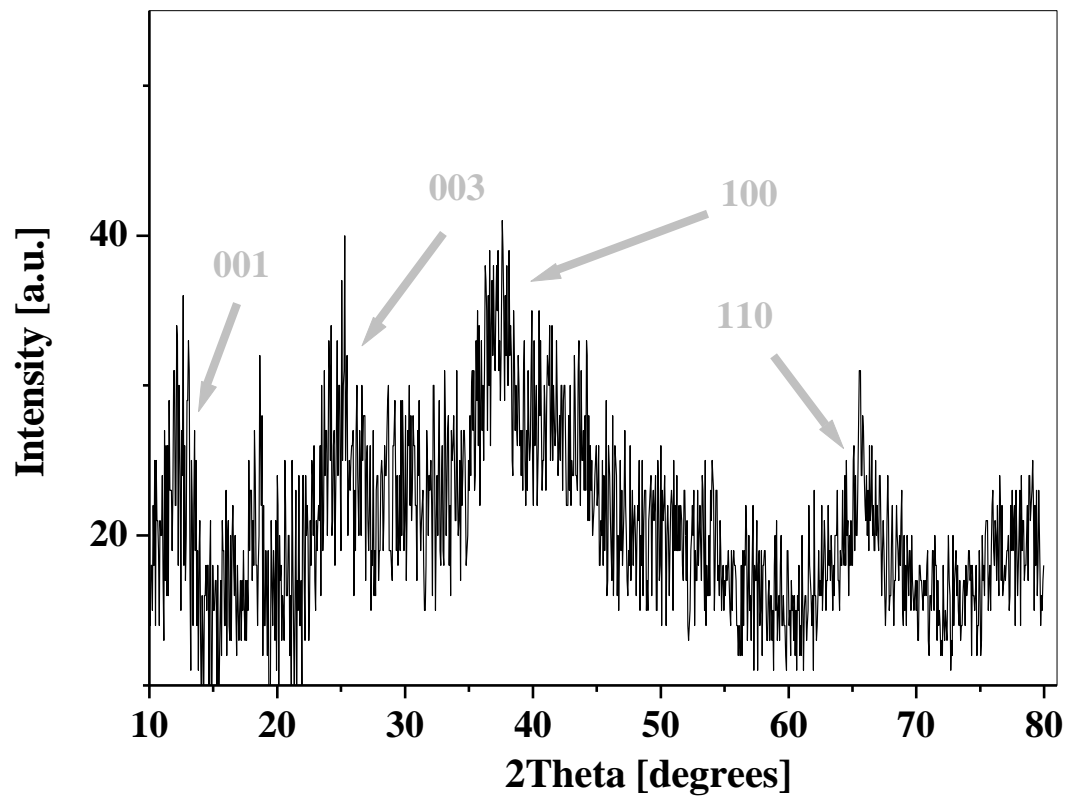

a

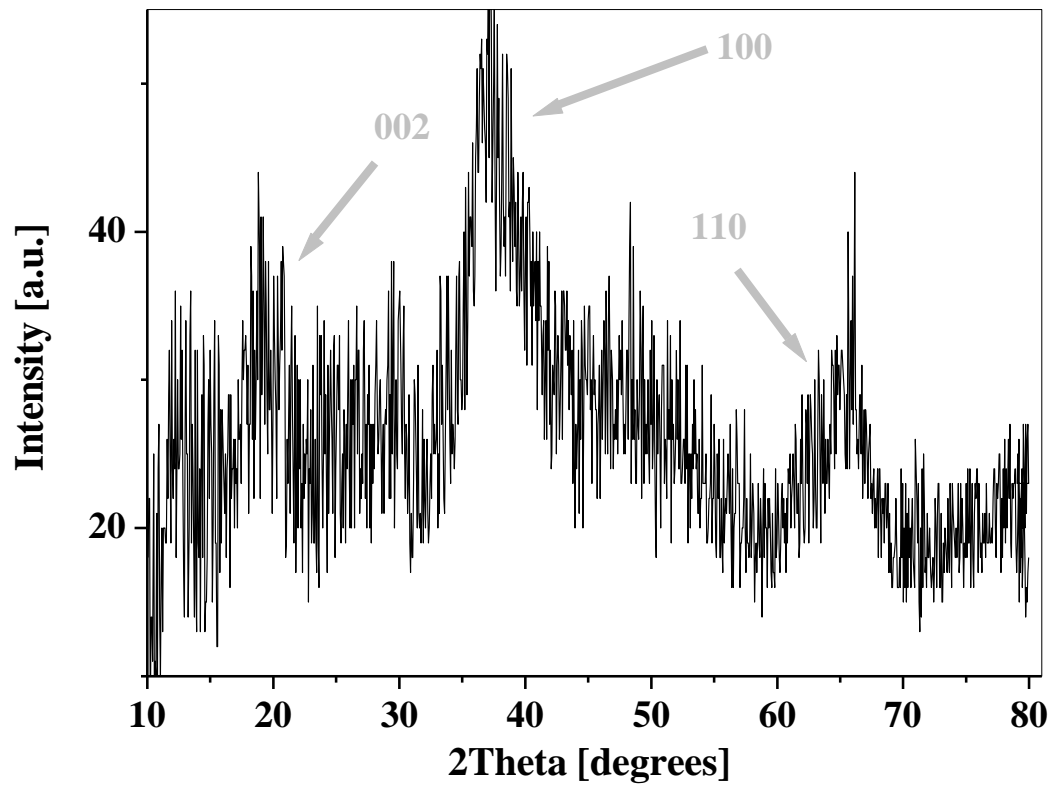

b

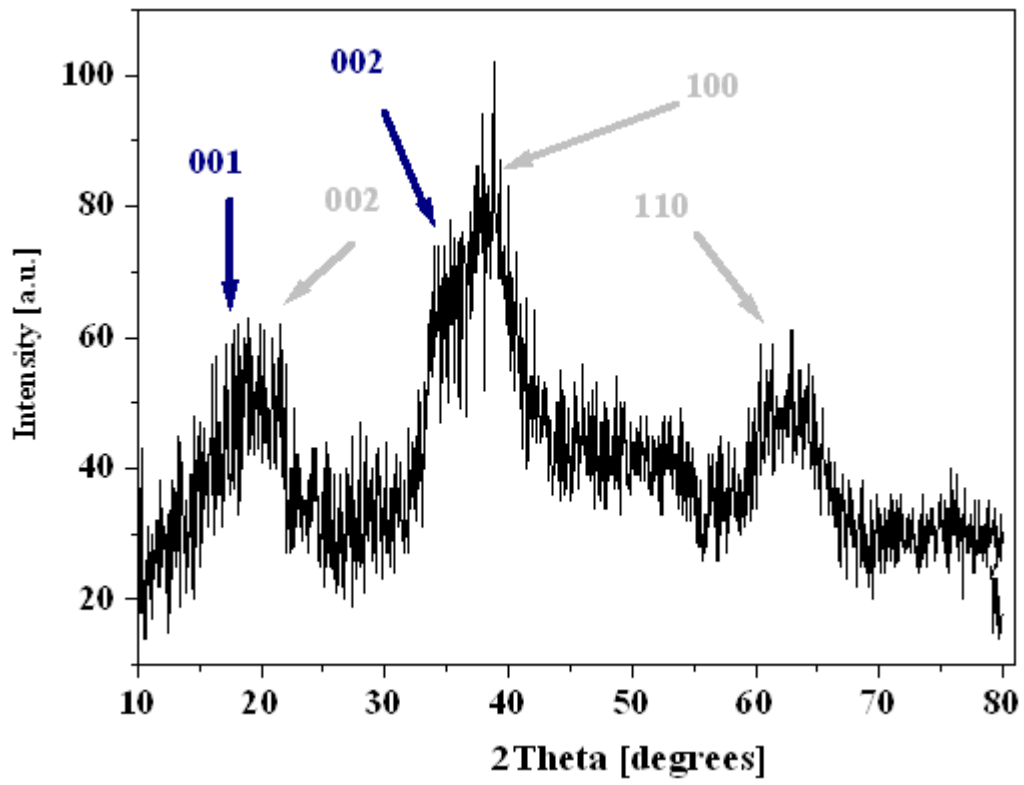

c

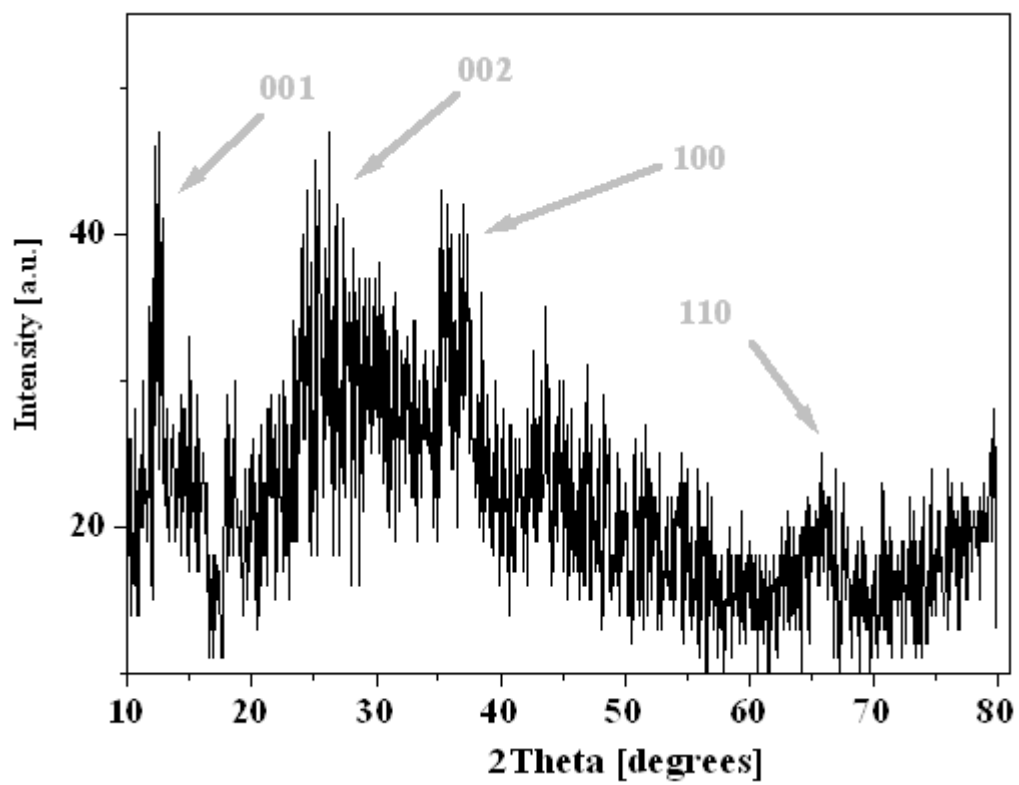

d

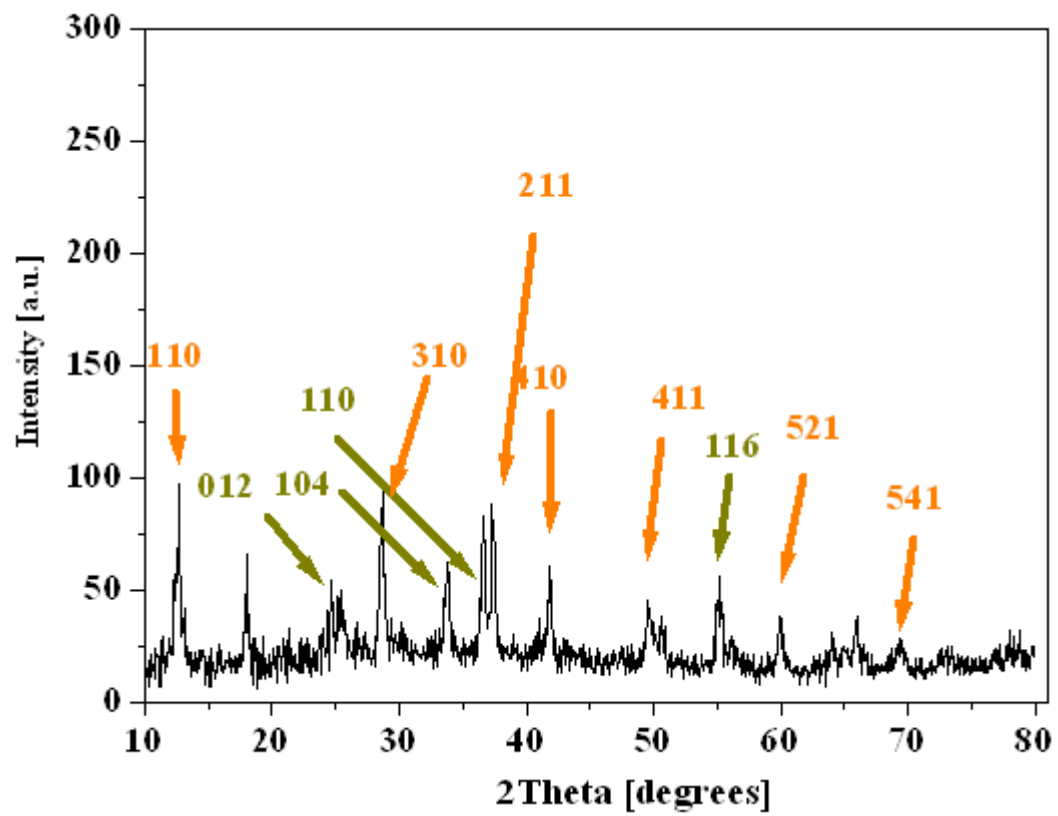

e

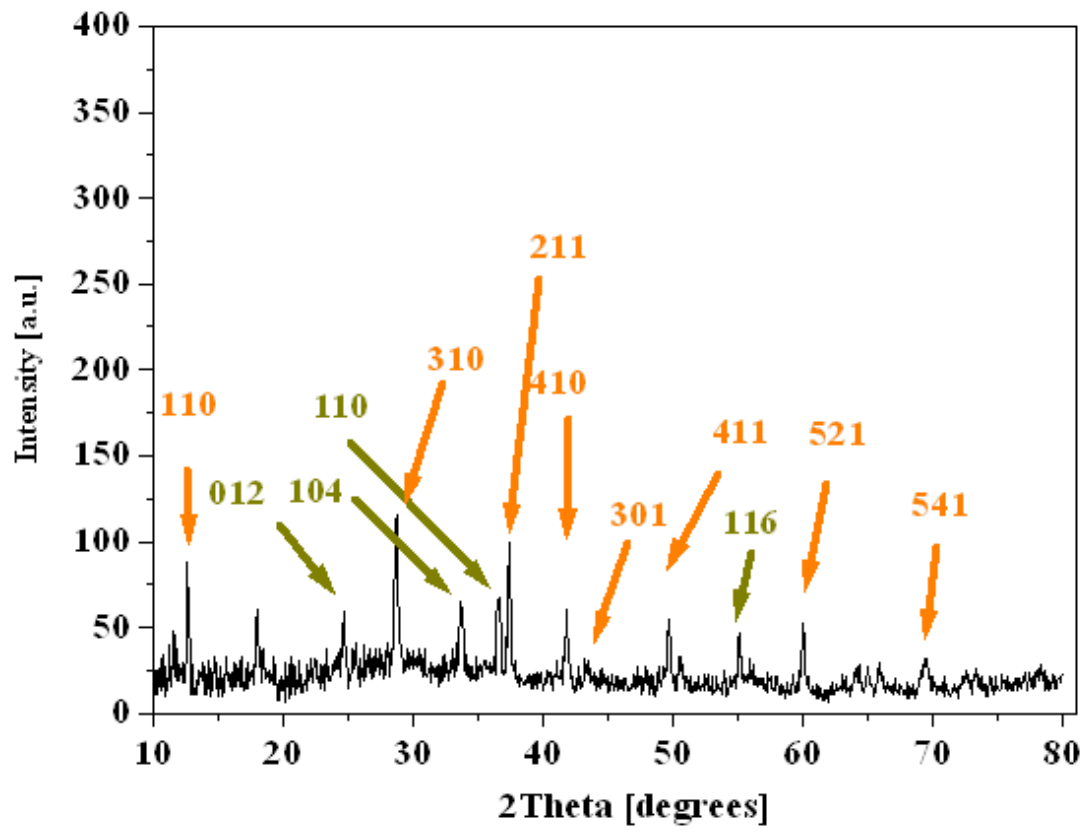

f

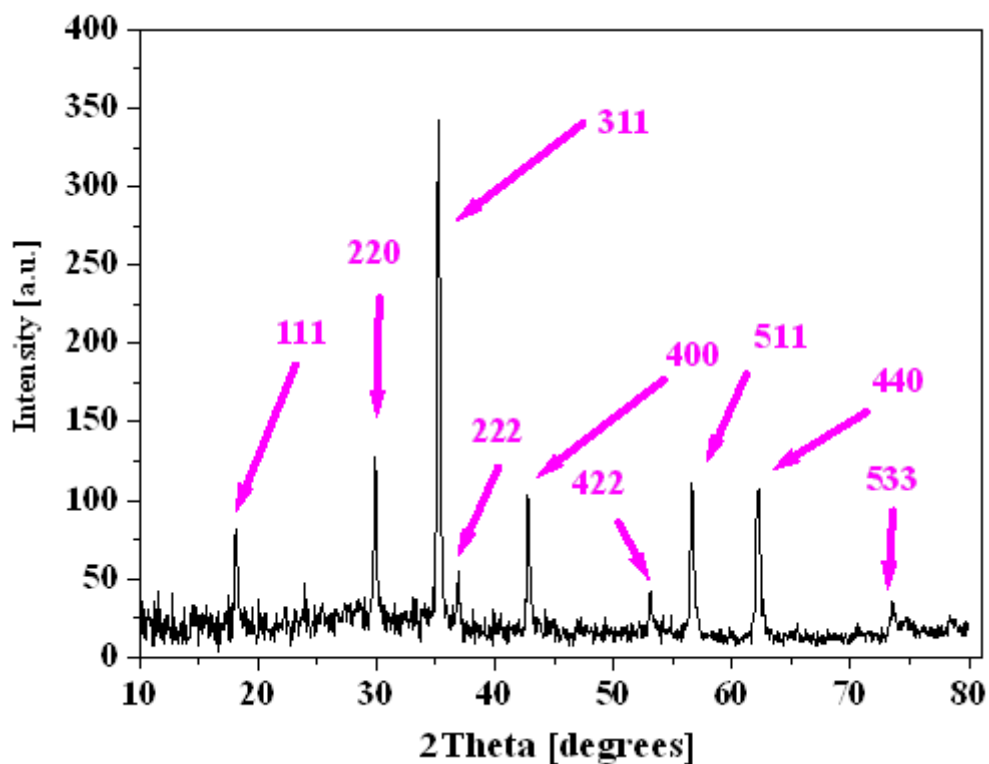

Fig. S5 XRD patterns for **3-Ni** (a), **5-Ni** (b) and **7-Ni** (c). **4-Ni** calcinated at 300 (d), 500 (e), 600 (f) and 700 (g) °C. Grey patterns for a-d show layered Mn oxide. In c, pattern (blue arrows) for Ni(OH)<sub>2</sub> is also observed. e and f contain KMn<sub>8</sub>O<sub>16</sub> (orange arrows) and NiMnO<sub>3</sub> (green arrows). In g, NiMn<sub>2</sub>O<sub>4</sub> (pink arrows) is detected.



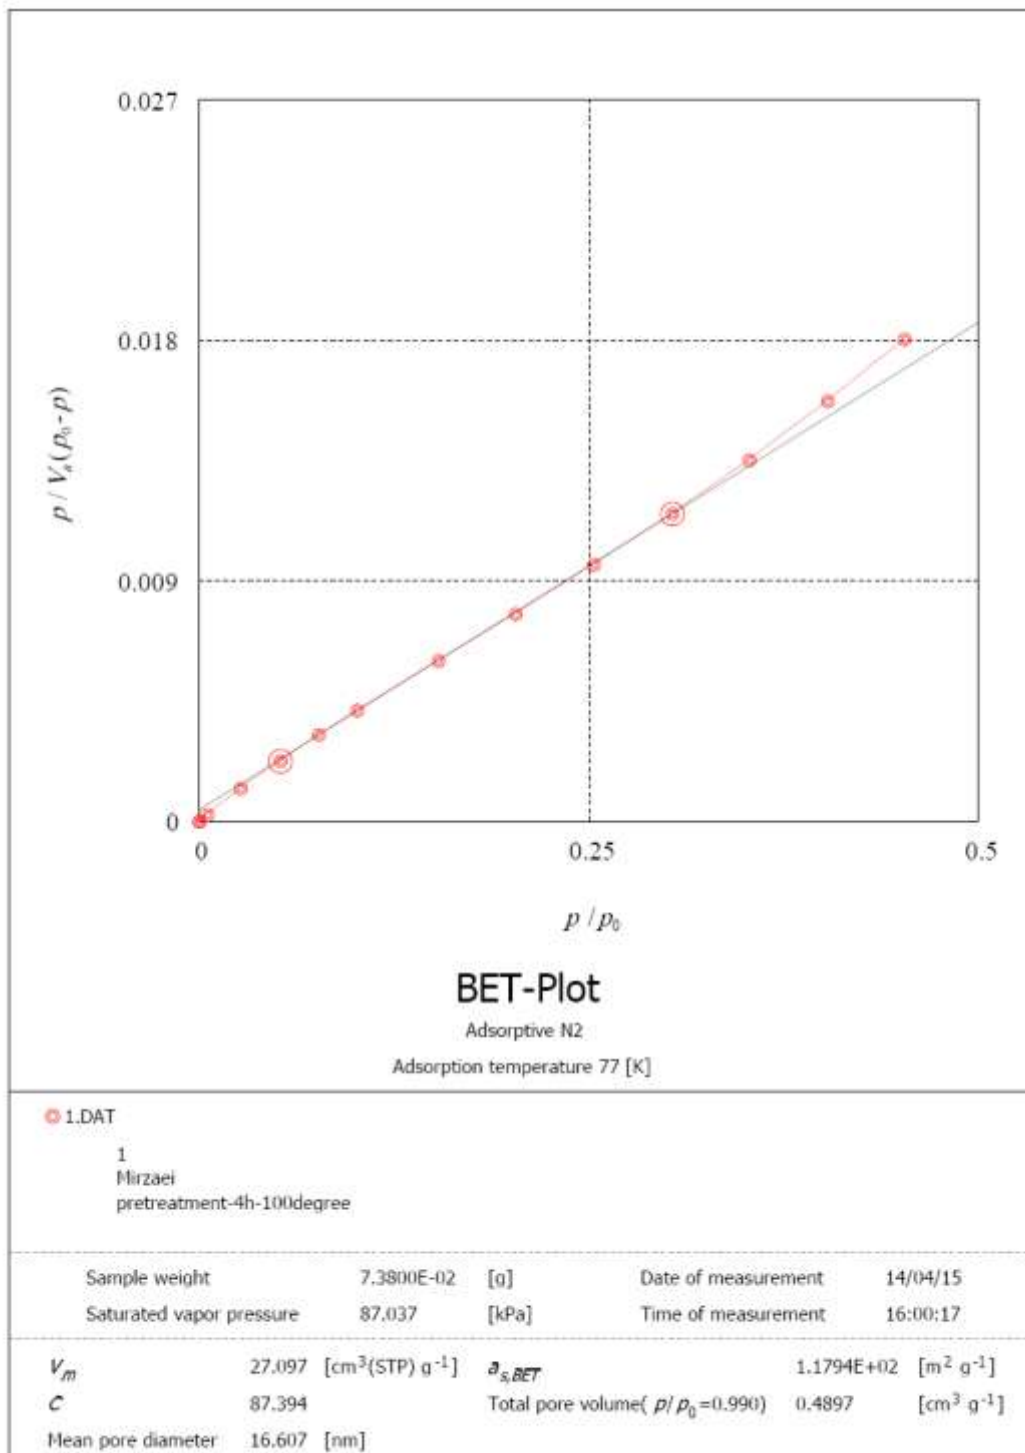

(a)

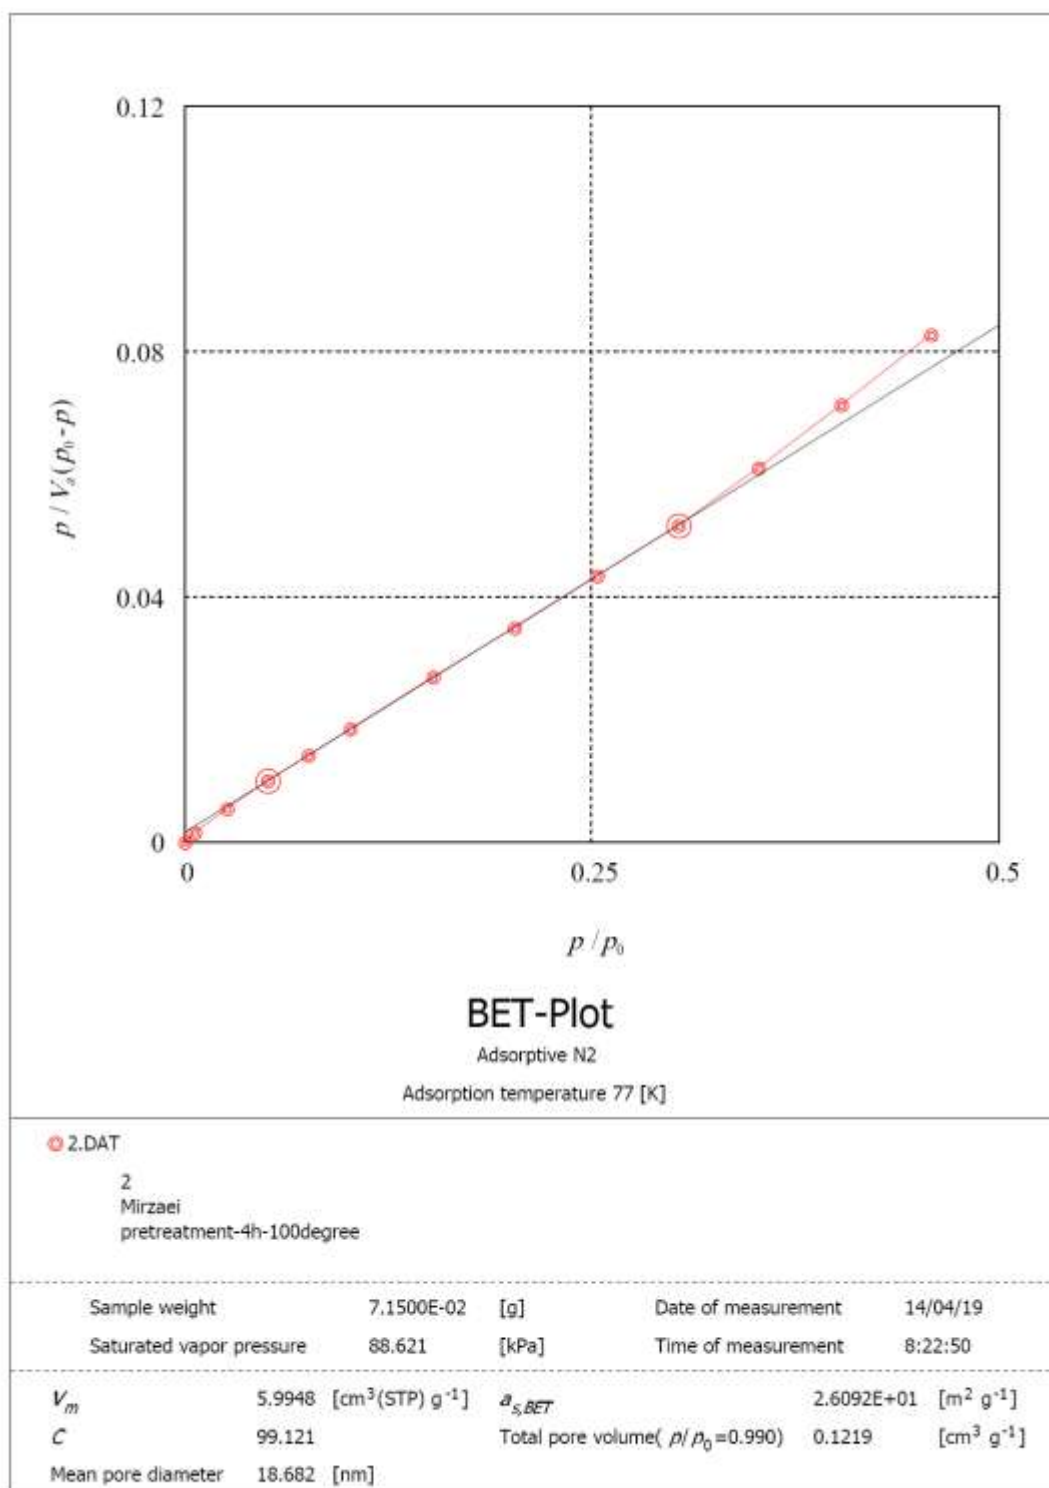

(b)

Fig. S6 BET results for **4**-Cu (a) and **4**-Ni (b).
